# Supplementary material
Source: Royal Society of Chemistry journal article supplement (doi:10.1039/d6cp00316h)
Supplement: d6cp00316h1.pdf [file d6cp00316h1.pdf]

Supplementary Information

**$^1\text{H}$  spin-lattice superparamagnetic relaxation enhancement for very large nanoparticles – neglecting the electronic relaxation**

Danuta Kruk<sup>a,\*</sup>, Adam Kasperek<sup>a</sup>, Robert Kruk<sup>b</sup>

<sup>a</sup> Department of Physics and Biophysics, University of Warmia and Mazury, Oczapowskiego 4, 10-719 Olsztyn, Poland,

<sup>b</sup> Department of Chemistry, University of Warmia and Mazury in Olsztyn, Plac Łódzki 4, 10-957 Olsztyn, Poland

\*Author to whom correspondence should be addressed: danuta.kruk@uwm.edu.pl

$^1\text{H}$  spin - lattice relaxation rates for water solutions of  $\text{Fe}_3\text{O}_4$ -IPG and  $\text{Fe}_3\text{O}_4$ -CA nanoparticles.

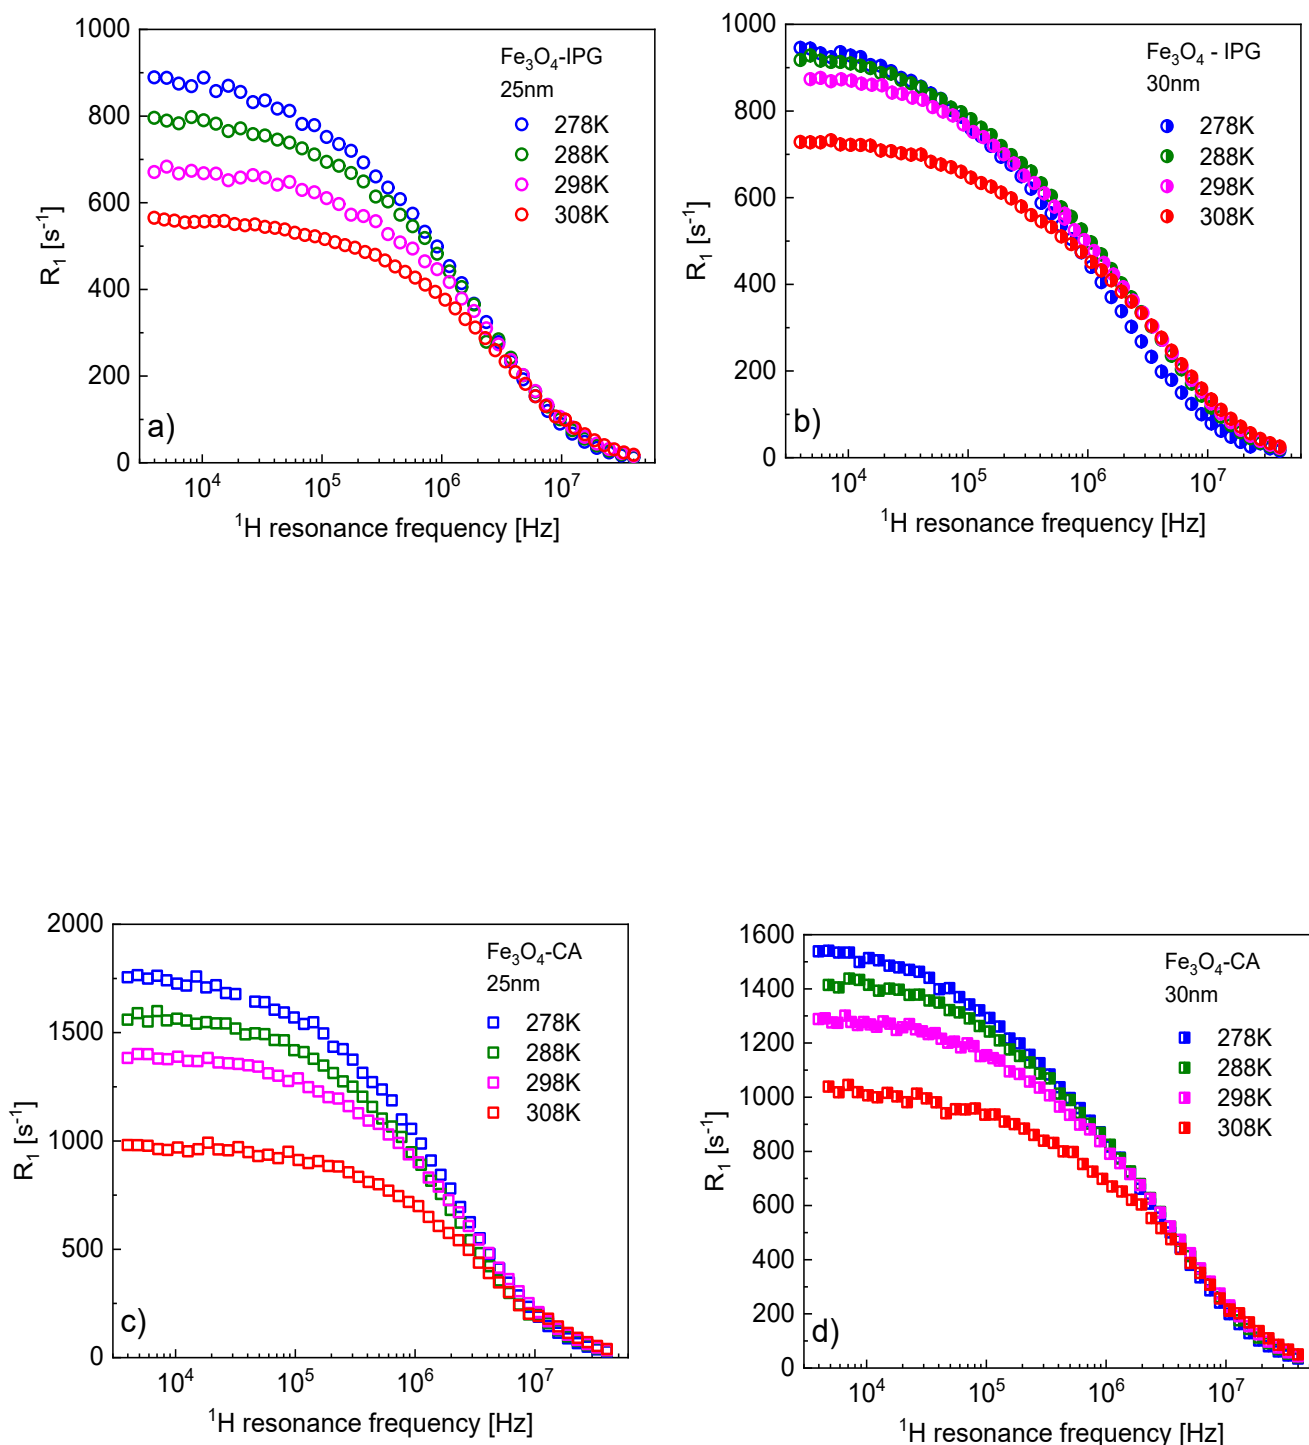

Fig.S1.  $^1\text{H}$  spin - lattice relaxation rates for water solutions of  $\text{Fe}_3\text{O}_4$ -IPG and  $\text{Fe}_3\text{O}_4$ -CA nanoparticles for the following concentrations:  $5.8 \times 10^{-8}\text{M}$  ( $\text{Fe}_3\text{O}_4$ -IPG, 25nm),  $3.4 \times 10^{-8}\text{M}$  ( $\text{Fe}_3\text{O}_4$ -IPG, 30nm),  $2.9 \times 10^{-7}\text{M}$  ( $\text{Fe}_3\text{O}_4$ -CA, 25nm) and  $1.7 \times 10^{-7}\text{M}$  ( $\text{Fe}_3\text{O}_4$ -CA, 30nm).

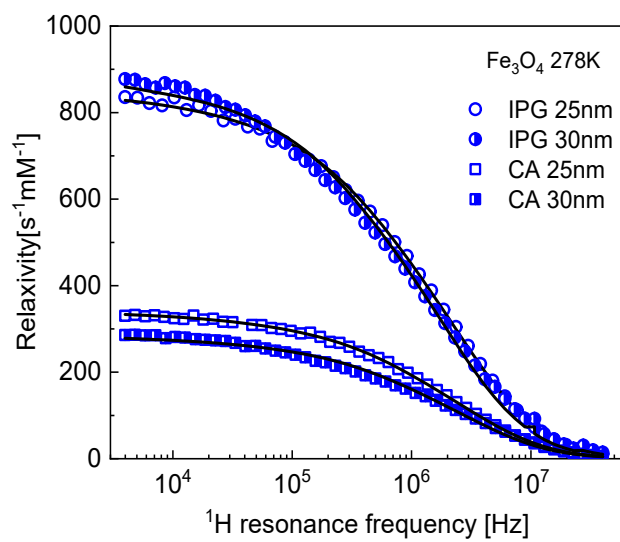

Fig.S2. Comparison of <sup>1</sup>H spin - lattice relaxation rates for water solutions of Fe<sub>3</sub>O<sub>4</sub>-IPG and Fe<sub>3</sub>O<sub>4</sub>-CA nanoparticles at 278K, normalized to 1mM concentration of Fe<sup>3+</sup>.
